# Supplementary material for: Secondary Organic Aerosol Formation from Nitrate Radical Oxidation of Styrene: Aerosol Yields, Chemical Composition, and Hydrolysis of Organic Nitrates
Source: Copernicus journal article supplement (doi:10.5194/egusphere-2024-3849), 2024-12-13
Supplement: Supplementary file 1 [file egusphere-2024-3849-supplement.pdf]

1 **Supplementary Information**

2  
3 **Secondary Organic Aerosol Formation from Nitrate Radical Oxidation of Styrene: Aerosol**  
4 **Yields, Chemical Composition, and Hydrolysis of Organic Nitrates**

5  
6 Yuchen Wang<sup>1,2</sup>, Xiang Zhang<sup>1</sup>, Yuanlong Huang<sup>3</sup>, Yutong Liang<sup>2,6</sup>, Nga L. Ng<sup>\*,2,4,5</sup>

7  
8 <sup>1</sup> College of Environmental Science and Engineering, Hunan University, Changsha, Hunan, 410082, China

9 <sup>2</sup> School of Chemical and Biomolecular Engineering, Georgia Institute of Technology, Atlanta, Georgia  
10 30332, USA

11 <sup>3</sup> Ningbo Institute of Digital Twin, Eastern Institute of Technology, Ningbo, 315200, China

12 <sup>4</sup> School of Civil and Environmental Engineering, Georgia Institute of Technology, Atlanta, Georgia 30332,  
13 USA

14 <sup>5</sup> School of Earth and Atmospheric Sciences, Georgia Institute of Technology, Atlanta, Georgia 30332,  
15 USA

16 <sup>6</sup> Thrust of Sustainable Energy and Environment, The Hong Kong University of Science and Technology  
17 (Guangzhou), Guangdong, 511453, China

18 \*Corresponding Author: Nga Lee Ng (ng@chbe.gatech.edu)

19  
20  
21  
22 This supplemental information contains 2 tables and 9 figures, totaling 16 pages including the cover page.

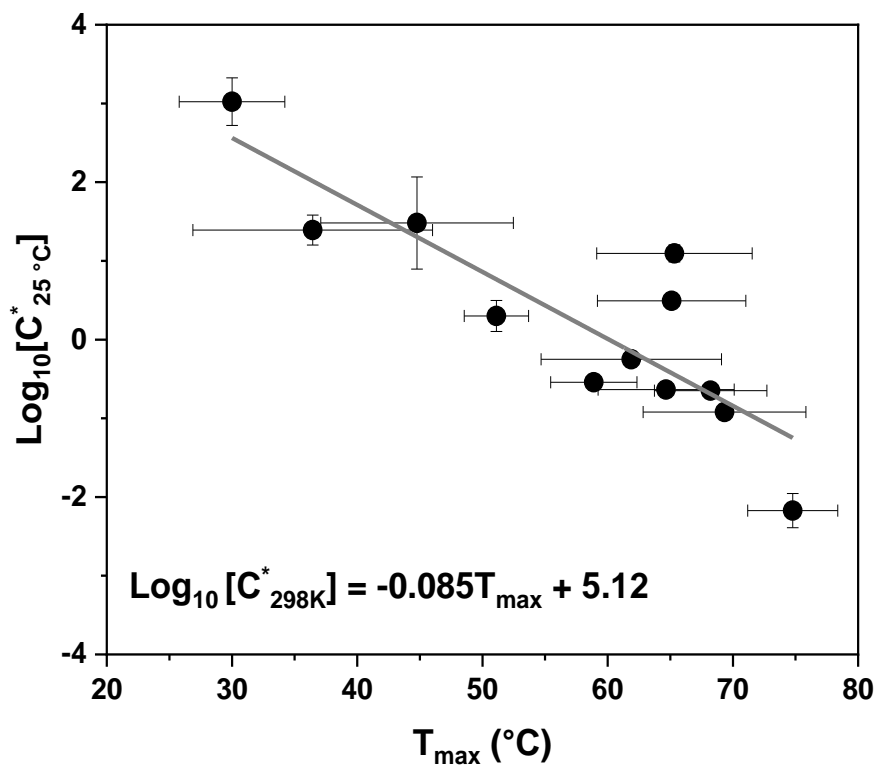

23  
 24 **Figure S1.** Volatility calibration curve of a filter inlet for gases and aerosols coupled to a chemical  
 25 ionization mass spectrometer (FIGAERO-CIMS). Filled circles and error bars are mean values and standard  
 26 deviation of two calibrations, respectively. The line represents a total least-squares fit. These results are  
 27 comparable to those reported in Takeuchi et al. (2022).

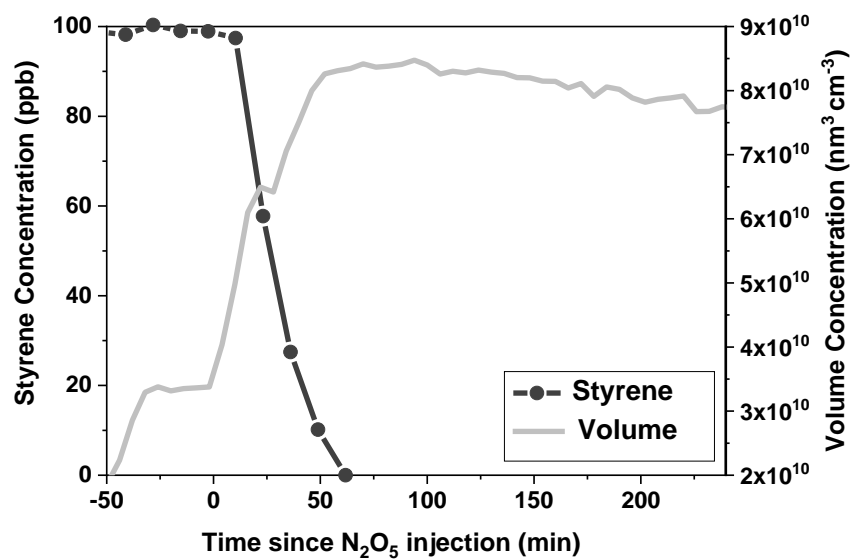

28  
 29 **Figure S2.** Typical time profile of the decay of styrene over time measured by GC-FID and aerosol  
 30 formation (volume concentration) measured by SMPS, particle wall loss corrected (Exp. 7).

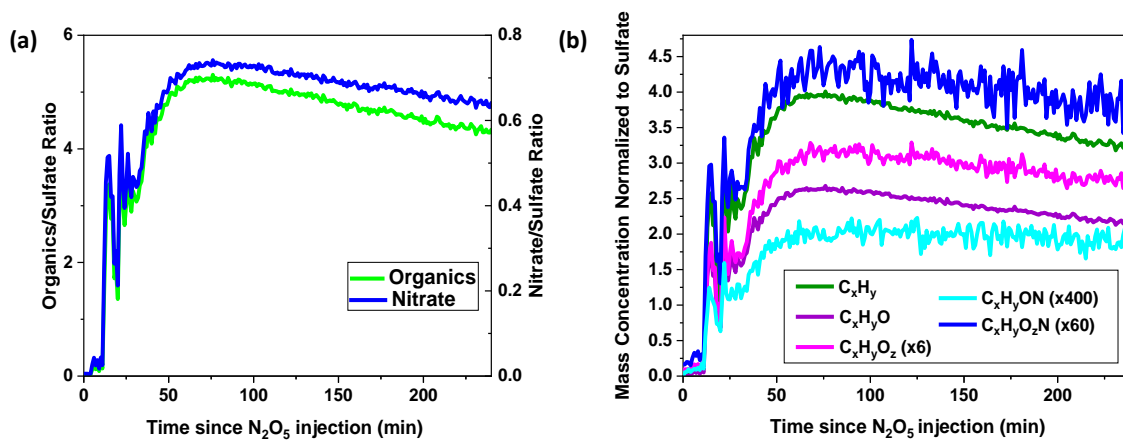

32

33 **Figure S3.** (a) Time series of mass concentrations of organics and nitrate (normalized to the sulfate mass  
 34 concentration); (b) Time series of mass concentrations of  $C_xH_y$ ,  $C_xH_yO$ ,  $C_xH_yO_2$ ,  $C_xH_yON$ , and  $C_xH_yO_2N$   
 35 families (normalized to the sulfate mass concentration) measured by HR-ToF-AMS (Exp.7).

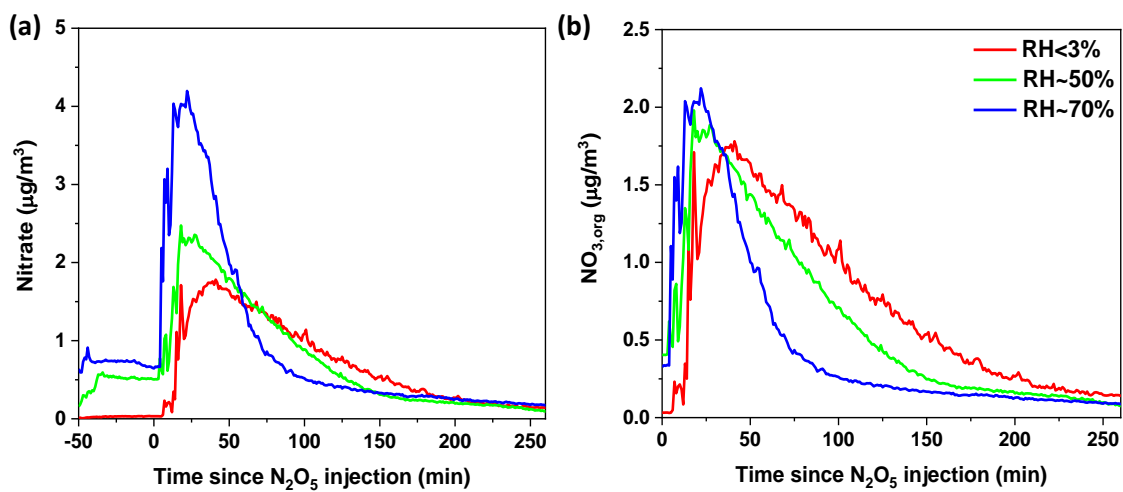

36  
 37 **Figure S4.** Time series of (a) nitrate measured by HR-ToF-AMS and (b) organic nitrates ( $NO_{3,org}$ ) from  
 38 Exp. 2 (RH < 3%), Exp. 11 (RH ~ 50%), and Exp. 12 (RH ~ 70%).

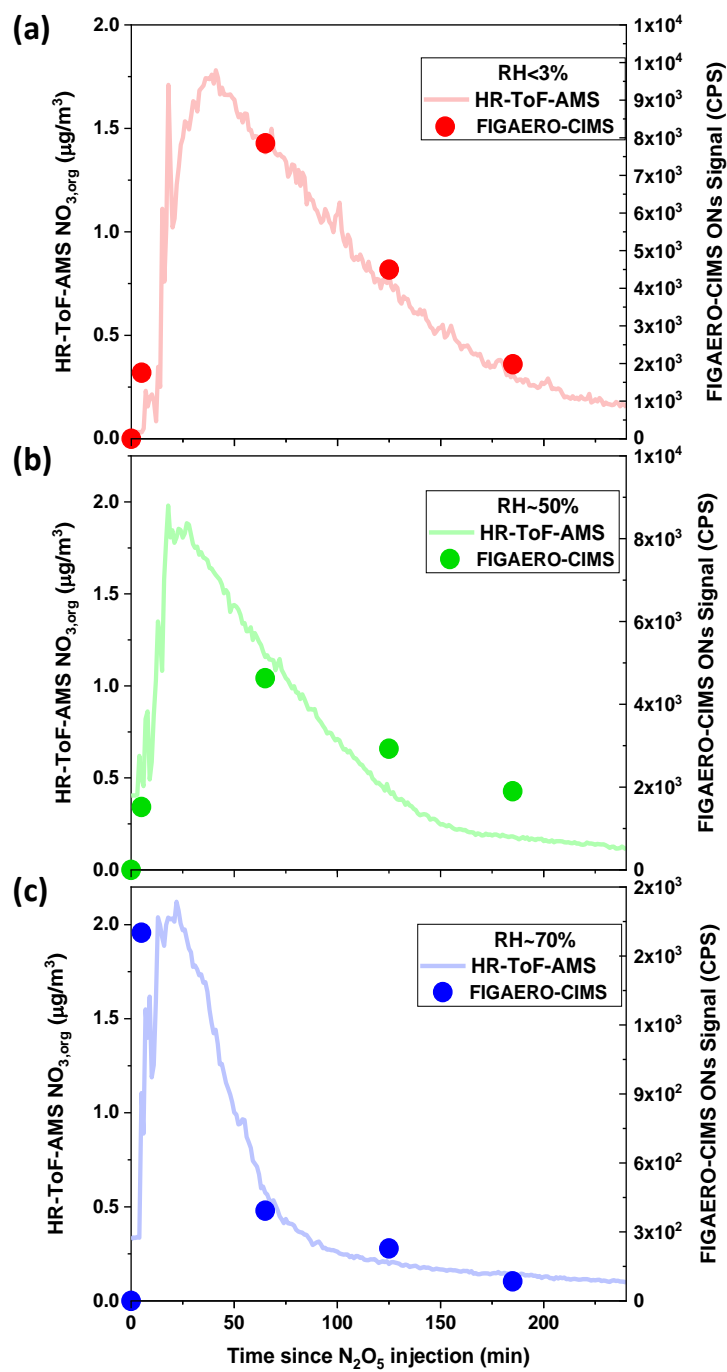

39  
 40 **Figure S5.** Time series of organic nitrates (NO<sub>3,org</sub>) measured by HR-ToF-AMS and the sum of ON signals  
 41 measured by FIGAERO-CIMS: (a) RH < 3% (Exp. 2); (b) RH ~ 50% (Exp. 11); and (c) RH ~ 70% (Exp. 12).

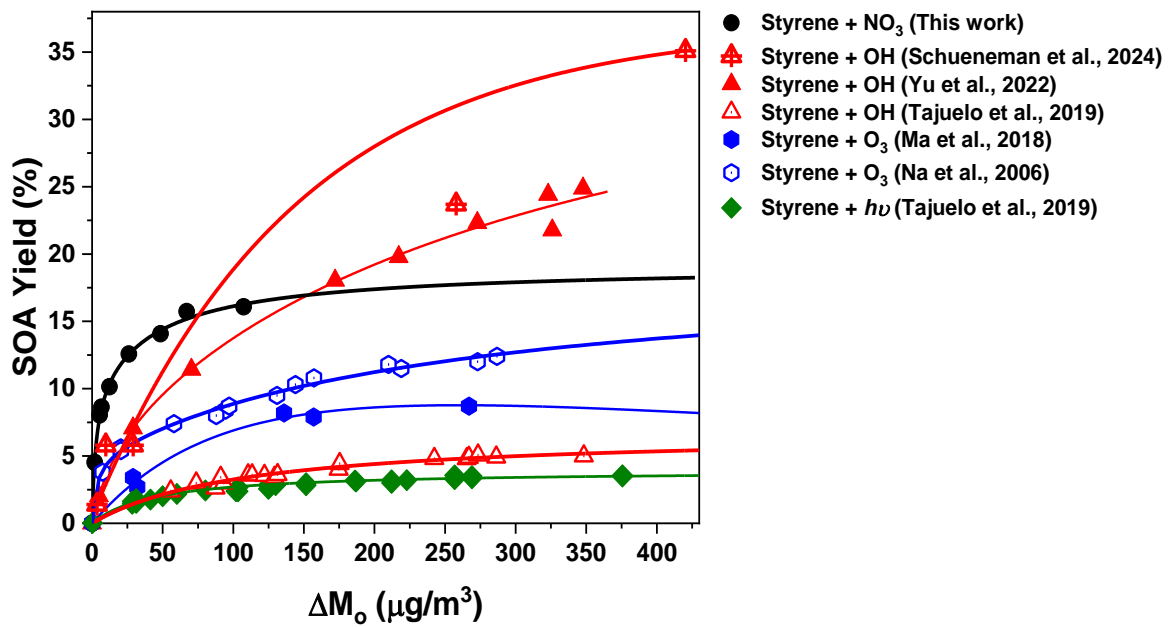

42  
 43 **Figure S6.** Comparison of SOA yields of styrene oxidation systems in this work and in literature (Yu et al.,  
 44 2022; Tajuelo et al., 2019; Ma et al., 2018; Na et al., 2006; Schueneman et al., 2024). The SOA yields and  
 45  $\Delta M_0$  in Schueneman et al., (2024) and in Tajuelo et al., (2019) are extracted by WebPlotDigitizer.

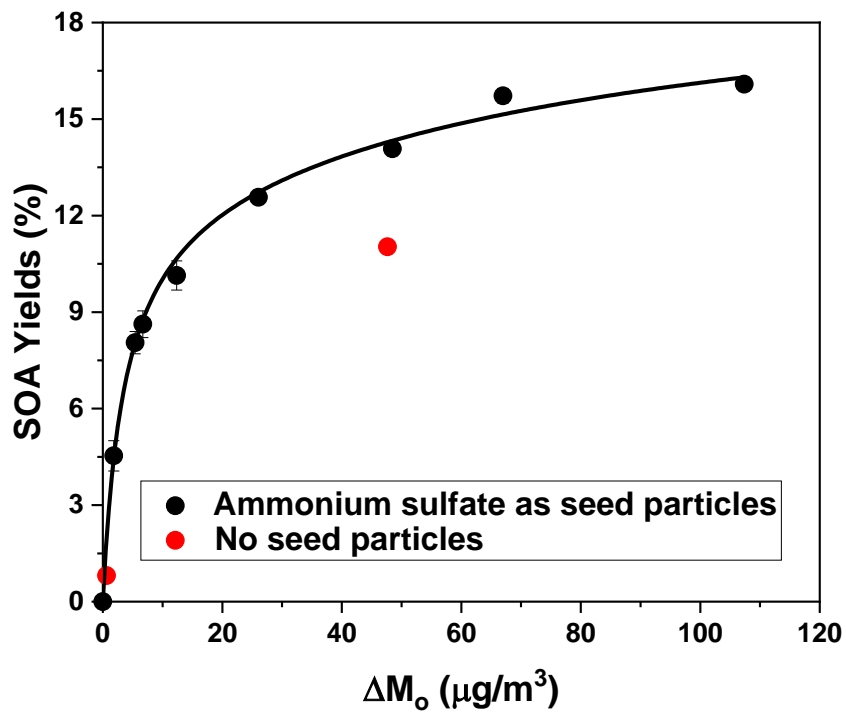

46  
47 **Figure S7.** SOA yields of styrene+NO<sub>3</sub> oxidation: with seed particles (filled circles; fitted to yield curve)  
48 and without any seed particles (red dots for Exp. 9 and 10).



## 49 Accounting for vapor wall loss in determining SOA yields

50 To evaluate the potential effect of organic vapor wall loss on SOA yields in our study, experiments  
 51 without seed particles are carried out. As shown in Figure S7, the SOA formation from nucleation  
 52 experiments (without seed particles) are lower than condensation experiments (with seed particles). We  
 53 employ the semi-empirical equation based on gas-to-particle partitioning of two semi-volatile products  
 54 (Odum et al., 1996, 1997) for SOA yields to correct for vapor wall loss in SOA yield determination (Eq.  
 55 S1).

$$56 \quad Y = \Delta M_O \left[ \frac{\alpha_1 K_1}{1+K_1 M_O} + \frac{\alpha_2 K_2}{1+K_2 M_O} \right] \quad \text{Eq. S1}$$

57 Where Y is the SOA yield,  $M_O$  is the aerosol mass loading,  $\alpha_1$  and  $\alpha_2$  are the fitted molar yields of the  
 58 two products, and  $K_1$  and  $K_2$  are the fitted partitioning coefficients of the two products. K is inversely  
 59 proportional to the saturation mass concentration ( $C^*$ ) of each pure semi-volatile compound. The correction  
 60 relies on the assumption that styrene+NO<sub>3</sub> oxidation yields two major products. After correcting for particle  
 61 wall loss, the total mass of products (C) can reside in three components: in the gas phase ( $C_g$ ), in the particle  
 62 phase ( $C_p$ ), and on the chamber wall ( $C_w$ ) due to vapor wall loss. In the two-product semi-empirical model,  
 63 the term  $\alpha$  represents the fitted molar yield. Therefore, the total mass concentration of products can also be  
 64 expressed as the products of the fitted molar yield and the amount of styrene reacted ( $\Delta HC$ ) as shown in  
 65 Eq. S2 and S3.

$$66 \quad C_g^1 + C_p^1 + C_w^1 = \Delta HC \times \alpha_1 \quad \text{Eq. S2}$$

$$67 \quad C_g^2 + C_p^2 + C_w^2 = \Delta HC \times \alpha_2 \quad \text{Eq. S3}$$

68 According to the two-layer model in Huang et al., (2018), the vapor wall loss is the overall decay of  
 69 vapor molecules in the surface and inner layers of the chamber wall after equilibrium (Eq. S4). As shown  
 70 in Eq. S5 and S6,  $C_w$  can be calculated from  $C_g$ , activity coefficient in Teflon film ( $r_1^\infty$ ),  $C^*$ , and equivalent  
 71 total wall concentration ( $C_{TW}$ , sum of  $C_w^1$  and  $C_w^2$ ).

$$72 \quad C_{TW} = \frac{10.8 \cdot A}{V} \quad \text{Eq. S4}$$

$$73 \quad C_g^1 = C_1^* \times r_1^\infty \times \frac{C_w^1}{C_{TW}} = C_1^* \times 10^{3.299} \times (C_1^*)^{-0.6407} \times \frac{C_w^1}{\frac{10.8 \cdot A}{V}} \quad \text{Eq. S5}$$

$$74 \quad C_g^2 = C_2^* \times r_2^\infty \times \frac{C_w^2}{C_{TW}} = C_2^* \times 10^{3.299} \times (C_2^*)^{-0.6407} \times \frac{C_w^2}{\frac{10.8 \cdot A}{V}} \quad \text{Eq. S6}$$

75 Where A refers to the chamber surface area (m<sup>2</sup>) and V refers to chamber volume (m<sup>3</sup>).

76 According to previous work (Pankow, 1994a, b),  $C_g$  can be calculated from  $C_p$ ,  $C^*$ , and  $M_O$  (Eq. S7  
 77 and S8).

$$78 \quad C_g^1 = C_1^* \times \frac{C_p^1}{M_O} \quad \text{Eq. S7}$$

79 
$$C_g^2 = C_2^* \times \frac{C_p^2}{M_O} \quad \text{Eq. S8}$$

80 Therefore, Eq. S2 and S3 can be rewritten to Eq. S9 and S10, respectively:

81 
$$C_1^* \times \frac{C_p^1}{M_O} + C_p^1 + \frac{C_p^1 \times C_{TW}}{M_O \times r_1^\infty} = \Delta HC \times \alpha_1 \quad \text{Eq. S9}$$

82 
$$C_2^* \times \frac{C_p^2}{M_O} + C_p^2 + \frac{C_p^2 \times C_{TW}}{M_O \times r_2^\infty} = \Delta HC \times \alpha_2 \quad \text{Eq. S10}$$

83 The two-product semi-empirical model (Eq. S1) can also be rewritten to Eq. S11:

84 
$$Y = \frac{\Delta M_O}{\Delta HC} = \frac{C_p^1 + C_p^2}{\Delta HC} = \frac{\frac{\Delta HC \times \alpha_1}{C_1^* \times \frac{1}{M_O} + 1 + \frac{C_{TW}}{M_O \times r_1^\infty}} + \frac{\Delta HC \times \alpha_2}{C_2^* \times \frac{1}{M_O} + 1 + \frac{C_{TW}}{M_O \times r_2^\infty}}}{\Delta HC} = \Delta M_O \left[ \frac{\alpha_1 K_1}{1 + K_1 M_O + \frac{K_1 \times C_{TW}}{r_1^\infty}} + \frac{\alpha_2 K_2}{1 + K_2 M_O + \frac{K_2 \times C_{TW}}{r_2^\infty}} \right]$$

85 
$$\quad \quad \quad \text{Eq. S11}$$

86 The  $\Delta M_O$  and SOA yields after the correction are shown in Table S1. SOA yield curve after the  
 87 correction is shown in Figure 1. The fitted molar yields ( $\alpha_1$  and  $\alpha_2$ ) are 0.84 and 0.14, and the fitted  
 88 partitioning coefficients ( $K_1$  and  $K_2$ ) are  $8.08 \times 10^{-4}$  and 7.48 after vapor wall loss correction ( $R^2 = 0.991$ ).

89

90 **Table S1.** SOA yield data for styrene+NO<sub>3</sub> oxidation with and without vapor wall loss correction.

| Exp | $\Delta M_o$ ( $\mu\text{g m}^{-3}$ ) | Corrected $\Delta M_o$ ( $\mu\text{g m}^{-3}$ ) | SOA Mass yield (%) | Corrected SOA Mass yield (%) |
|-----|---------------------------------------|-------------------------------------------------|--------------------|------------------------------|
| 1   | 1.9                                   | 5.9                                             | 4.5                | 14.5                         |
| 2   | 5.4                                   | 9.6                                             | 8.1                | 14.3                         |
| 3   | 6.8                                   | 11                                              | 8.6                | 14.2                         |
| 4   | 12.4                                  | 17.1                                            | 10.1               | 14.0                         |
| 5   | 26.1                                  | 32.5                                            | 12.6               | 15.7                         |
| 6   | 48.5                                  | 60.2                                            | 14.1               | 17.5                         |
| 7   | 67.0                                  | 85.4                                            | 15.7               | 20.0                         |
| 8   | 107.4                                 | 147.6                                           | 16.1               | 22.1                         |

91

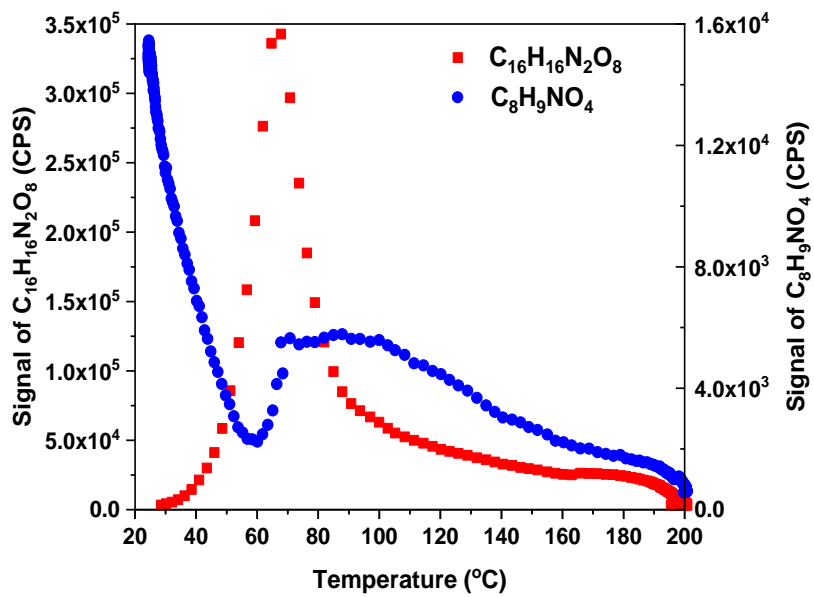

93  
94 **Figure S8.** Thermal desorption profiles of  $C_{16}H_{16}N_2O_8$  and  $C_8H_9NO_4$  in FIGAERO-CIMS from Exp. 7.  
95 Data points are averages of three desorption cycles around the time of the peak SOA mass concentration.

**Pathway C: Proposed Mechanisms for ONs Formation from Nitrooxy Peroxy Radical Isomer**

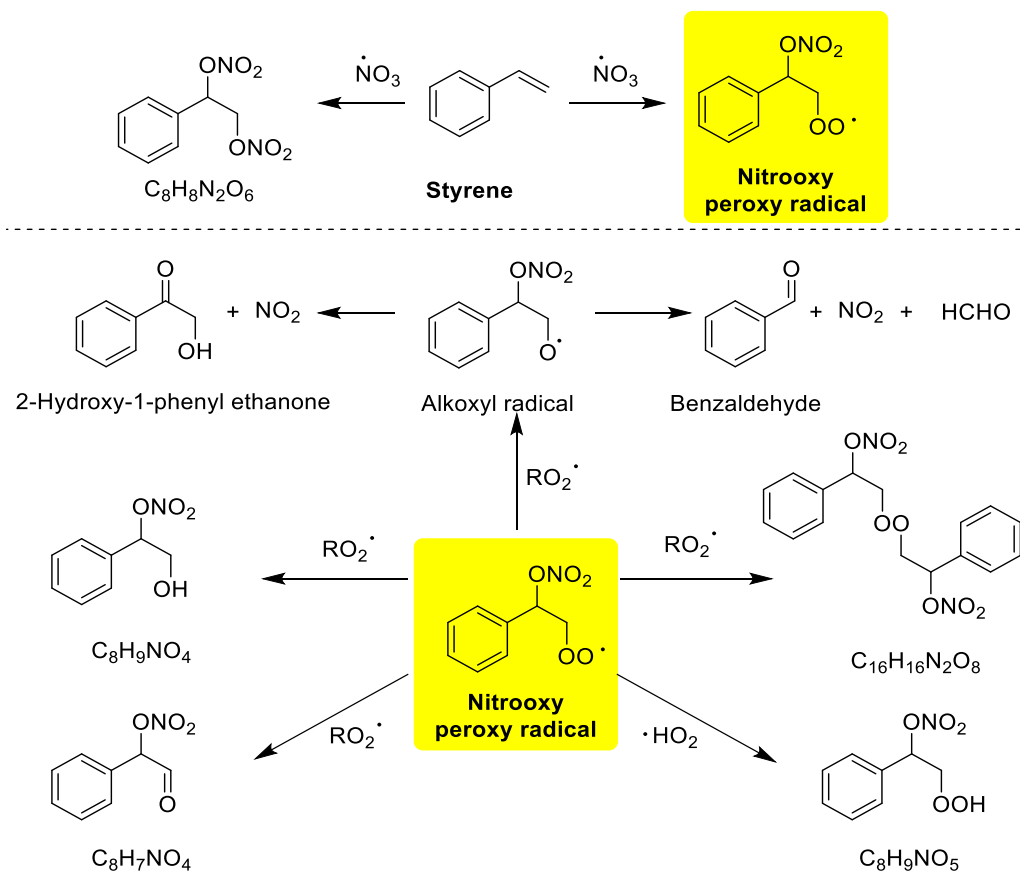

96

97 **Figure S9.** Proposed mechanisms for the major particle-phase products resulting from further reactions of  
 98 the nitrooxy peroxy radical. The nitrooxy peroxy radical is highlighted in yellow as the major  $\text{RO}_2$  in the  
 99 mechanisms.

100 **Table S2.** Possible dimeric aromatic ONs measured by FIGAERO-CIMS in ambient studies.

| Molecular Formula <sup>a</sup>                                 | Molecular Weight | RDBE <sup>b</sup> | Xc <sup>c</sup> |
|----------------------------------------------------------------|------------------|-------------------|-----------------|
| C <sub>20</sub> H <sub>21</sub> NO <sub>5</sub>                | 354.142          | 11                | 2.78            |
| C <sub>20</sub> H <sub>23</sub> NO <sub>5</sub>                | 356.1576         | 10                | 2.75            |
| C <sub>20</sub> H <sub>21</sub> NO <sub>6</sub>                | 370.1369         | 11                | 2.75            |
| C <sub>20</sub> H <sub>23</sub> NO <sub>6</sub>                | 372.1525         | 10                | 2.71            |
| C <sub>20</sub> H <sub>21</sub> NO <sub>7</sub>                | 386.1318         | 11                | 2.71            |
| C <sub>20</sub> H <sub>22</sub> N <sub>2</sub> O <sub>7</sub>  | 401.1427         | 11                | 2.80            |
| C <sub>19</sub> H <sub>22</sub> N <sub>2</sub> O <sub>8</sub>  | 405.1376         | 10                | 2.75            |
| C <sub>20</sub> H <sub>20</sub> N <sub>2</sub> O <sub>8</sub>  | 415.1219         | 11                | 2.78            |
| C <sub>20</sub> H <sub>22</sub> N <sub>2</sub> O <sub>8</sub>  | 417.1376         | 11                | 2.78            |
| C <sub>20</sub> H <sub>24</sub> N <sub>2</sub> O <sub>8</sub>  | 419.1533         | 10                | 2.75            |
| C <sub>19</sub> H <sub>22</sub> N <sub>2</sub> O <sub>9</sub>  | 421.1325         | 10                | 2.71            |
| C <sub>22</sub> H <sub>26</sub> N <sub>2</sub> O <sub>7</sub>  | 429.174          | 11                | 2.80            |
| C <sub>20</sub> H <sub>22</sub> N <sub>2</sub> O <sub>9</sub>  | 433.1325         | 11                | 2.75            |
| C <sub>20</sub> H <sub>24</sub> N <sub>2</sub> O <sub>9</sub>  | 435.1482         | 10                | 2.71            |
| C <sub>22</sub> H <sub>26</sub> N <sub>2</sub> O <sub>8</sub>  | 445.1689         | 11                | 2.78            |
| C <sub>20</sub> H <sub>22</sub> N <sub>2</sub> O <sub>10</sub> | 449.1274         | 11                | 2.71            |
| C <sub>22</sub> H <sub>26</sub> N <sub>2</sub> O <sub>9</sub>  | 461.1638         | 11                | 2.75            |

101 <sup>a</sup>. The molecular formula are obtained from a field campaign conducted in Shenzhen, China, using FIGAERO-CIMS. (Ye et al.,  
102 2021) <sup>b</sup>. RDBE is ring and double-bond equivalence.  $RDBE = \frac{Carbon\ number \times 2 + 2 - Hydrogen\ number + Nitrogen\ number}{2}$ . <sup>c</sup>. Xc is  
103 aromaticity equivalent.  $Xc = \frac{3 \times (RDBE - (Oxygen\ number - 3 \times Nitrogen\ number)) - 2}{RDBE - (Oxygen\ number - 3 \times Nitrogen\ number)}$ . The aromaticity equivalent equation, as discussed by  
104 Yassine et al. (2014) and Wang et al. (2017), has been revised based on the assumption that the nitrooxy group requires three oxygen  
105 atoms.

106 **References:**

- 107 Huang, Y., Zhao, R., Charan, S. M., Kenseth, C. M., Zhang, X., and Seinfeld, J. H.: Unified Theory of  
108 Vapor-Wall Mass Transport in Teflon-Walled Environmental Chambers, *Environ. Sci. Technol.*, 52,  
109 2134–2142, <https://doi.org/10.1021/acs.est.7b05575>, 2018.
- 110 Kroll, J. H. and Seinfeld, J. H.: Chemistry of secondary organic aerosol: Formation and evolution of low-  
111 volatility organics in the atmosphere, *Atmos. Environ.*, 42, 3593–3624,  
112 <https://doi.org/10.1016/j.atmosenv.2008.01.003>, 2008.
- 113 Ma, Q., Lin, X., Yang, C., Long, B., Gai, Y., and Zhang, W.: The influences of ammonia on aerosol  
114 formation in the ozonolysis of styrene: Roles of cregee intermediate reactions, *R. Soc. Open Sci.*, 5,  
115 172171–172183, <https://doi.org/10.1098/rsos.172171>, 2018.
- 116 Na, K., Song, C., and Cocker, D. R.: Formation of secondary organic aerosol from the reaction of styrene  
117 with ozone in the presence and absence of ammonia and water, *Atmos. Environ.*, 40, 1889–1900,  
118 <https://doi.org/10.1016/j.atmosenv.2005.10.063>, 2006.
- 119 Odum, J. R., Hoffmann, T., Bowman, F., Collins, D., Flagan, R. C., and Seinfeld, J. H.: Gas/particle  
120 partitioning and secondary organic aerosol yields, *Environ. Sci. Technol.*, 30, 2580–2585,  
121 <https://doi.org/10.1021/es950943+>, 1996.
- 122 Odum, J. R., Jungkamp, T. P. W., Griffin, R. J., Flagan, R. C., and Seinfeld, J. H.: The Atmospheric  
123 Aerosol-Forming Potential of Whole Gasoline Vapor, *Science (80-. )*, 276, 96–99,  
124 <https://doi.org/10.1126/science.276.5309.96>, 1997.
- 125 Pankow, J. F.: An absorption model of gas/particle partitioning of organic compounds in the atmosphere,  
126 *Atmos. Environ.*, 28, 185–188, [https://doi.org/https://doi.org/10.1016/1352-2310\(94\)90093-0](https://doi.org/https://doi.org/10.1016/1352-2310(94)90093-0), 1994a.
- 127 Pankow, J. F.: An absorption model of the gas/aerosol partitioning involved in the formation of secondary  
128 organic aerosol, *Atmos. Environ.*, 28, 189–193, [https://doi.org/https://doi.org/10.1016/1352-](https://doi.org/https://doi.org/10.1016/1352-2310(94)90094-9)  
129 [2310\(94\)90094-9](https://doi.org/https://doi.org/10.1016/1352-2310(94)90094-9), 1994b.
- 130 Schueneman, M. K., Day, D. A., Peng, Z., Pagonis, D., Jenks, O. J., de Gouw, J. A., and Jimenez, J. L.:  
131 Secondary Organic Aerosol Formation from the OH Oxidation of Phenol, Catechol, Styrene, Furfural,  
132 and Methyl Furfural, *ACS Earth Sp. Chem.*, 8, 1179–1192,  
133 <https://doi.org/10.1021/acsearthspacechem.3c00361>, 2024.
- 134 Tajuelo, M., Rodríguez, D., Baeza-Romero, M. T., Díaz-de-Mera, Y., Aranda, A., and Rodríguez, A.:  
135 Secondary organic aerosol formation from styrene photolysis and photooxidation with hydroxyl  
136 radicals, *Chemosphere*, 231, 276–286, <https://doi.org/10.1016/j.chemosphere.2019.05.136>, 2019.
- 137 Takeuchi, M., Berkemeier, T., Eris, G., and Ng, N. L.: Non-linear effects of secondary organic aerosol  
138 formation and properties in multi-precursor systems, *Nat. Commun.*, 13, 1–13,  
139 <https://doi.org/10.1038/s41467-022-35546-1>, 2022.

140 Wang, X., Hayeck, N., Brüggemann, M., Yao, L., Chen, H., Zhang, C., Emmelin, C., Chen, J., George, C.,  
141 and Wang, L.: Chemical Characteristics of Organic Aerosols in Shanghai: A Study by Ultrahigh-  
142 Performance Liquid Chromatography Coupled With Orbitrap Mass Spectrometry, *J. Geophys. Res.*  
143 *Atmos.*, 122, 11,703-11,722, <https://doi.org/10.1002/2017JD026930>, 2017.

144 Yassine, M. M., Harir, M., Dabek-Zlotorzynska, E., and Schmitt-Kopplin, P.: Structural characterization  
145 of organic aerosol using Fourier transform ion cyclotron resonance mass spectrometry: aromaticity  
146 equivalent approach, *Rapid Commun. Mass Spectrom.*, 28, 2445–2454,  
147 <https://doi.org/10.1002/rcm.7038>, 2014.

148 Ye, C., Yuan, B., Lin, Y., Wang, Z., Hu, W., Li, T., Chen, W., Wu, C., Wang, C., Huang, S., Qi, J., Wang,  
149 B., Wang, C., Song, W., Wang, X., Zheng, E., Krechmer, J. E., Ye, P., Zhang, Z., Wang, X., Worsnop,  
150 D. R., and Shao, M.: Chemical characterization of oxygenated organic compounds in the gas phase  
151 and particle phase using iodide CIMS with FIGAERO in urban air, *Atmos. Chem. Phys.*, 21, 8455–  
152 8478, <https://doi.org/10.5194/acp-21-8455-2021>, 2021.

153 Yu, S. S., Jia, L., Xu, Y. F., and Pan, Y. P.: Molecular composition of secondary organic aerosol from  
154 styrene under different NO<sub>x</sub> and humidity conditions, *Atmos. Res.*, 266, 105950,  
155 <https://doi.org/10.1016/j.atmosres.2021.105950>, 2022.

156
